# Supplementary material
Source: PubMed Central journal article supplement (PMC3084597)
Supplement: NIHMS265993-supplement-1.pdf [file NIHMS265993-supplement-1.pdf]

## Meta-analysis identifies 29 additional ulcerative colitis risk loci, increasing the number of confirmed associations to 47

Carl A. Anderson<sup>1</sup>, Gabrielle Boucher<sup>2,3,79</sup>, Charlie W. Lees<sup>4,79</sup>, Andre Franke<sup>5,79</sup>, Mauro D'Amato<sup>6,79</sup>, Kent D. Taylor<sup>7</sup>, James C. Lee<sup>8</sup>, Philippe Goyette<sup>2,3</sup>, Marcin Imielinski<sup>9</sup>, Anna Latiano<sup>10</sup>, Caroline Lagacé<sup>2,3</sup>, Regan Scott<sup>11</sup>, Leila Amininejad<sup>12</sup>, Suzannah Bumpstead<sup>1</sup>, Leonard Baidoo<sup>11</sup>, Robert N. Baldassano<sup>13</sup>, Murray Barclay<sup>14</sup>, Theodore M. Bayless<sup>15</sup>, Stephan Brand<sup>16</sup>, Carsten Büning<sup>17</sup>, Jean-Frédéric Colombel<sup>18</sup>, Lee A. Denson<sup>19</sup>, Martine De Vos<sup>20</sup>, Marla Dubinsky<sup>21</sup>, Cathryn Edwards<sup>22</sup>, David Ellinghaus<sup>5</sup>, Rudolf S.N. Fehrmann<sup>23</sup>, James A.B. Floyd<sup>1</sup>, Tim Florin<sup>24</sup>, Denis Franchimont<sup>25</sup>, Lude Franke<sup>23</sup>, Michel Georges<sup>26</sup>, Jürgen Glas<sup>16</sup>, Nicole L. Glazer<sup>27</sup>, Stephen L. Guthery<sup>28</sup>, Talin Haritunians<sup>29</sup>, Nicholas K. Hayward<sup>30</sup>, Jean-Pierre Hugot<sup>31</sup>, Gilles Jobin<sup>2,32</sup>, Debby Laukens<sup>20</sup>, Ian Lawrance<sup>33</sup>, Marc Lémann<sup>34</sup>, Arie Levine<sup>35</sup>, Cecile Libioule<sup>36</sup>, Edouard Louis<sup>36</sup>, Dermot P. McGovern<sup>7,29</sup>, Monica Milla<sup>37</sup>, Grant W. Montgomery<sup>30</sup>, Katherine I. Morley<sup>1</sup>, Craig Mowat<sup>38</sup>, Aylwin Ng<sup>39,40</sup>, William Newman<sup>41</sup>, Roel A Ophoff<sup>42</sup>, Laura Papi<sup>43</sup>, Orazio Palmieri<sup>10</sup>, Laurent Peyrin-Biroulet<sup>44</sup>, Julián Panés<sup>45</sup>, Anne Phillips<sup>38</sup>, Natalie J. Prescott<sup>46</sup>, Deborah D. Proctor<sup>47</sup>, Rebecca Roberts<sup>14</sup>, Richard Russell<sup>48</sup>, Paul Rutgeerts<sup>49</sup>, Jeremy Sanderson<sup>50</sup>, Miquel Sans<sup>51</sup>, Philip Schumm<sup>52</sup>, Frank Seibold<sup>53</sup>, Yashoda Sharma<sup>47</sup>, Lisa Simms<sup>30</sup>, Mark Seielstad<sup>54,55</sup>, A. Hillary Steinhart<sup>56</sup>, Stephan R. Targan<sup>7</sup>, Leonard H. van den Berg<sup>57</sup>, Morten Vatn<sup>58</sup>, Hein Verspaget<sup>59</sup>, Thomas Walters<sup>60</sup>, Cisca Wijmenga<sup>23</sup>, David C. Wilson<sup>48,61</sup>, Harm-Jan Westra<sup>23</sup>, Ramnik J. Xavier<sup>39,40</sup>, Zhen Z. Zhao<sup>30</sup>, Cyriel Y. Ponsioen<sup>62</sup>, Vibeke Andersen<sup>63</sup>, Leif Torkvist<sup>64</sup>, Maria Gazouli<sup>65</sup>, Nicholas P. Anagnou<sup>65</sup>, Tom H. Karlsen<sup>58</sup>, Limas Kupcinskas<sup>66</sup>, Jurgita Sventoraityte<sup>66</sup>, John C. Mansfield<sup>67</sup>, Subra Kugathasan<sup>68</sup>, Mark S. Silverberg<sup>56</sup>, Jonas Halfvarson<sup>69</sup>, Jerome I. Rotter<sup>29</sup>, Christopher G. Mathew<sup>46</sup>, Anne M. Griffiths<sup>60</sup>, Richard Garray<sup>14</sup>, Tariq Ahmad<sup>70</sup>, Steven R. Brant<sup>15</sup>, Mathias Chamaillard<sup>71</sup>, Jack Satsangi<sup>4</sup>, Judy H. Cho<sup>47,72</sup>, Stefan Schreiber<sup>5,73</sup>, Mark J. Daly<sup>74</sup>, Jeffrey C. Barrett<sup>1</sup>, Miles Parkes<sup>8</sup>, Vito Annese<sup>10,37</sup>, Hakon Hakonarson<sup>13,75,80</sup>, Graham Radford-Smith<sup>76,80</sup>, Richard H. Duerr<sup>11,77,80</sup>, Séverine Vermeire<sup>49,80</sup>, Rinse K. Weersma<sup>78,80</sup>, John D. Rioux<sup>2,3</sup>

<sup>1</sup>Wellcome Trust Sanger Institute, Wellcome Trust Genome Campus, Hinxton, Cambridge, UK. <sup>2</sup>Université de Montréal, Medicine, Montréal, Québec, Canada. <sup>3</sup>Montreal Heart Institute, Research Center, Montréal, Québec, Canada. <sup>4</sup>University of Edinburgh, Western General Hospital, Gastrointestinal Unit, Molecular Medicine Centre, Edinburgh, UK. <sup>5</sup>Christian-Albrechts-University Kiel, Institute of Clinical Molecular Biology, Kiel, Germany. <sup>6</sup>Karolinska Institute, Department of Biosciences and Nutrition, Stockholm, Sweden. <sup>7</sup>Cedars-Sinai Medical Center, Inflammatory Bowel and Immunobiology Research Institute, Los Angeles, California, USA. <sup>8</sup>Addenbrooke's Hospital, University of Cambridge, Gastroenterology Research Unit, Cambridge, UK. <sup>9</sup>The Children's Hospital of Philadelphia, Center for Applied Genomics, Philadelphia, Pennsylvania, USA. <sup>10</sup>IRCCS-CSS Hospital, Unit of Gastroenterology, San Giovanni Rotondo, Italy. <sup>11</sup>University of Pittsburgh School of Medicine, Division of Gastroenterology, Hepatology and Nutrition, Department of

Medicine, Pittsburgh, Pennsylvania, USA. <sup>12</sup>Erasmus Hospital, Free University of Brussels, Department of Gastroenterology, Brussels, Belgium. <sup>13</sup>The Children's Hospital of Philadelphia, Department of Pediatrics, Center for Pediatric Inflammatory Bowel Disease, Philadelphia, Pennsylvania, USA. <sup>14</sup>University of Otago, Department of Medicine, Christchurch, New Zealand. <sup>15</sup>Johns Hopkins University School of Medicine, Meyeroff Inflammatory Bowel Disease Center, Dept. of Medicine, Baltimore, Maryland, USA. <sup>16</sup>University Hospital Munich, Department of Medicine II, Munich, Germany. <sup>17</sup>Universitätsmedizin Berlin, Department of Gastroenterology, Charité, Campus Mitte, Berlin, Germany. <sup>18</sup>Université de Lille Department of Hepato-Gastroenterology, Lille, France. <sup>19</sup>Cincinnati Children's Hospital Medical Center, Pediatric Gastroenterology, Cincinnati, Ohio, USA. <sup>20</sup>Ghent University Hospital, Department of Hepatology and Gastroenterology, Ghent, Belgium. <sup>21</sup>Cedars-Sinai Medical Center, Department of Pediatrics, Los Angeles, California, USA. <sup>22</sup>Torbay Hospital, Department of Gastroenterology, Torbay, Devon, UK. <sup>23</sup>University Medical Center Groningen, Department of Genetics, Groningen, the Netherlands. <sup>24</sup>Mater Health Services, Department of Gastroenterology, Brisbane, Australia. <sup>25</sup>Erasmus Hospital, Free University of Brussels, Department of Gastroenterology, Brussels, Belgium. <sup>26</sup>University of Liège, Department of Genetics, Faculty of Veterinary Medicine, Liège, Belgium. <sup>27</sup>University of Washington, Cardiovascular Health Research Unit, Department of Internal Medicine, Seattle, Washington, USA. <sup>28</sup>University of Utah School of Medicine, Department of Pediatrics, Salt Lake City, Utah, USA. <sup>29</sup>Cedars-Sinai Medical Center, Medical Genetics Institute, Los Angeles, California, USA. <sup>30</sup>Queensland Institute of Medical Research, Genetic Epidemiology, Brisbane, Australia. <sup>31</sup>Université Paris Diderot & INSERM & Hopital Robert Debre APHP, Gastroenterology, Paris, France. <sup>32</sup>Hôpital Maisonneuve-Rosemont, Dept of Gastroenterology, Montréal, Québec, Canada. <sup>33</sup>The University of Western Australia, School of Medicine and Pharmacology, Fremantle, Australia. <sup>34</sup>Université Paris Diderot, GETAID group, Paris, France. <sup>35</sup>Tel Aviv University, Pediatric Gastroenterology Unit, Wolfson Medical Center and Sackler School of Medicine, Tel Aviv, Israel. <sup>36</sup>Centre Hospitalier Universitaire Université de Liège, Division of Gastroenterology, Liège, Belgium. <sup>37</sup>AOU Careggi, Unit of Gastroenterology SOD2, Florence, Italy. <sup>38</sup>Ninewells Hospital and Medical School, Dept of Medicine, Dundee, UK. <sup>39</sup>Massachusetts General Hospital, Harvard Medical School, Gastroenterology Unit <sup>40</sup>Center for Computational and Integrative Biology, Massachusetts General Hospital, Boston, Massachusetts, USA. <sup>41</sup>University of Manchester Department of Medical Genetics, Manchester, UK. <sup>42</sup>University Medical Center Utrecht, Department of Medical Genetics, Utrecht, Netherlands. <sup>43</sup>University of Florence, Institute of Human Genetics, Florence, Italy. <sup>44</sup>University Hospital of Nancy, Department of Hepato-Gastroenterology, Vandoeuvre-lès-Nancy, France. <sup>45</sup>Hospital Clínic de Barcelona, IDIBAPS, CIBERehd, Department of Gastroenterology, Barcelona, Spain. <sup>46</sup>King's College London School of Medicine, Guy's Hospital, Department of Medical and Molecular Genetics, London, UK. <sup>47</sup>Yale University, Section of Digestive Diseases, Department of Medicine, New Haven, Connecticut, USA. <sup>48</sup>Royal Hospital for Sick Children, Paediatric Gastroenterology and Nutrition, Glasgow, UK. <sup>49</sup>University Hospital Gasthuisberg, Division of Gastroenterology, Leuven, Belgium. <sup>50</sup>Guy's & St Thomas' NHS Foundation Trust, St Thomas' Hospital,

Dept Gastroenterology, London, UK. <sup>51</sup>Hospital Clínic de Barcelona, IDIBAPS, CIBERehd, Department of Gastroenterology, Barcelona, Spain. <sup>52</sup>University of Chicago, Department of Health Studies, Chicago, Illinois, USA. <sup>53</sup>University of Bern, Division of Gastroenterology, Inselspital, Bern, Switzerland. <sup>54</sup>Genome Institute of Singapore, Human Genetics, Singapore. <sup>55</sup>Institute for Human Genetics, University of California San Francisco, San Francisco, California, USA. <sup>56</sup>University of Toronto, Mount Sinai Hospital Inflammatory Bowel Disease Centre, Toronto, Ontario, Canada. <sup>57</sup>Rudolf Magnus Institute of Neuroscience, University Medical Center Utrecht, Department of Neurology, Utrecht, the Netherlands. <sup>58</sup>Rikshospitalet University Hospital, Medical Department, Oslo, Norway. <sup>59</sup>Leiden University Medical Center, Experimental Gastroenterology, Leiden, the Netherlands. <sup>60</sup>The Hospital for Sick Children, University of Toronto, Toronto, Ontario, Canada. <sup>61</sup>Child Life and Health, University of Edinburgh, Scotland. <sup>62</sup>Academic Medical Center, Department of Gastroenterology, Amsterdam, the Netherlands. <sup>63</sup>Viborg Regional Hospital, Medical Department, Viborg, Denmark. <sup>64</sup>Karolinska Institutet, Department of Clinical Science Intervention and Technology, Stockholm, Sweden. <sup>65</sup>University of Athens, Department of Biology, School of Medicine, Athens, Greece. <sup>66</sup>Kaunas University of medicine, Department of Gastroenterology, Kaunas, Lithuania. <sup>67</sup>Newcastle University, Institute of Human Genetics, Newcastle upon Tyne, UK. <sup>68</sup>Emory School of Medicine, Department of Genetics and Department of Pediatrics, Atlanta, Georgia, USA. <sup>69</sup>Örebro University Hospital, Department of Medicine, Örebro, Sweden. <sup>70</sup>Peninsula College of Medicine and Dentistry, Barrack Road, Exeter, UK. <sup>71</sup>Inserm, U1019, Lille, France. <sup>72</sup>Yale University, Department of Genetics, Yale School of Medicine, New Haven CT. <sup>73</sup>Department for General Internal Medicine, Christian-Albrechts-University, Kiel, Germany. <sup>74</sup>Massachusetts General Hospital, Harvard Medical School, Center for Human Genetic Research, Boston, Massachusetts, USA. <sup>75</sup>Center for Applied Genomics, The Children's Hospital of Philadelphia, Philadelphia, Pennsylvania, USA. <sup>76</sup>Queensland Institute of Medical Research, IBD Research Group, Brisbane, Australia. <sup>77</sup>University of Pittsburgh Graduate School of Public Health, 130 Desoto Street, Pittsburgh, PA, USA. <sup>78</sup>University Medical Center Groningen, Department of Gastroenterology, Groningen, the Netherlands. <sup>79</sup>These authors contributed equally to this work. <sup>80</sup>These authors contributed equally to this work. Correspondence should be addressed to C.A.A. ([carl.anderson@sanger.ac.uk](mailto:carl.anderson@sanger.ac.uk)) or J.D.R. ([john.david.rioux@umontreal.ca](mailto:john.david.rioux@umontreal.ca)).

## **Meta-analysis identifies 29 additional ulcerative colitis risk loci, increasing the number of confirmed associations to 47**

1. Supplementary Table 1 – Index GWAS studies included in the meta-analysis.
2. Supplementary Table 2 – Country of origin of samples used in the follow-up experiment.
3. Supplementary Table 3a – Cohort specific results for all SNPs listed in Table 1 and Table 2.
4. Supplementary Table 3b – Cohort specific results for all SNPs included in follow-up phase, but failed our thresholds for follow-up.
5. Supplementary Table 4 – Subphenotype analyses at new ulcerative colitis risk loci.
6. Supplementary Table 5 – Ulcerative colitis risk variants correlated with eQTL.
7. Supplementary Table 6 – Ulcerative colitis risk variants correlated ( $r^2 > 0.5$ ) with non-synonymous and splice-site disrupting SNPs.
8. Supplementary Table 7 – Summary of candidate genes mapping from *in silico* analysis on the 47 UC loci.
9. Supplementary Table 8 – Results from the functional enrichment analysis across all loci associated with UC susceptibility.
10. Supplementary Table 9 – Results from the International IBD Genetics Consortium CD and UC meta-analyses for the 99 loci reported for association in CD and/or UC.
11. Supplementary Figure 1 – Quantile-Quantile plots of observed vs expected chi-square statistics for the nine constituent genome-wide scans and the meta-analysis.
12. Supplementary Figure 2 – Locus wide association plots for all 47 UC loci, generated using SNAP.
13. Supplementary Figure 3 – Enrichment of biological functions for genes located in the associated UC risk loci.

**Supplementary Table 1. Index GWAS studies included in the meta-analysis. Samples sizes are given post quality control.**

The Cedars Sinai cohort was split into Jewish (253 cases and 323 controls) and non-Jewish (470 cases and 2,557 controls) for imputation and analysis. The NIDDK cohort was split into Jewish (98 cases and 451 controls), Northern-European descent (776 cases and 1,505 controls) and Southern-European descent (103 cases and 166 controls), as determined by self-reported Jewish descent and principal component analysis.

| Index GWAS   | Ulcerative Colitis cases | Population controls | Genotyping platform      |
|--------------|--------------------------|---------------------|--------------------------|
| Cedars-Sinai | 723                      | 2,880               | Illumina HumanCNV370     |
| German       | 1,036                    | 1,694               | Affymetrix SNP array 5.0 |
| CHOPSTICKS   | 643                      | 6,197               | Affymetrix SNP array 6.0 |
| NIDDK        | 977                      | 2122                | Illumina HumanHap550     |
| Swedish      | 948                      | 1,408               | Illumina HumanHap300     |
| WTCCC        | 2,360                    | 5,417               | Illumina HumanHap550     |
| TOTAL        | 6,687                    | 19,718              | Affymetrix SNP array 6.0 |

**Supplementary Table 2. Country of origin of samples used in the follow-up experiment.**

| Country         | Ulcerative Colitis cases | Population controls | Genotyping platform      |
|-----------------|--------------------------|---------------------|--------------------------|
| Australia       | 1,139                    | 1,891               | Sequenom iPlex           |
| Belgium         | 1,001                    | 1,634               | Sequenom iPlex           |
| Denmark         | 169                      | 720                 | Sequenom iPlex           |
| France          | 127                      | 158                 | SNPlex                   |
| Germany         | 1,176                    | 2,083               | Sequenom iPlex           |
| Italy           | 1,485                    | 968                 | Sequenom iPlex           |
| Lithuania       | 387                      | 970                 | SNPlex/Taqman            |
| New Zealand     | 470                      | 455                 | Sequenom iPlex           |
| Norwegian       | 268                      | 282                 | Affymetrix SNP array 5.0 |
| The Netherlands | 750                      | 786                 | Sequenom iPlex           |
| Sweden          | 369                      | 706                 | Sequenom iPlex           |
| United Kingdom  | 2,095                    | 1,850               | Sequenom iPlex           |
| United States   | 192                      | 414                 | Sequenom iPlex           |
| TOTAL           | 9,628                    | 12,917              |                          |

**Supplementary Table 3a. Cohort specific results for all SNPs listed in Table 1 and Table 2.**

\*SNP selected for follow-up was not the most associated SNP in the final version of the GWAS meta-analysis. FU is risk allele frequency in controls. For GWAS, we included proportional weight given to the study, calculated from empirical variance in the imputed data. Number of cases and controls are respectively given for each component.

This supplementary table is available for download as an Excel file.

**Supplementary Table 3b. Cohort specific results for all SNPs included in follow-up phase, but failed our thresholds for follow-up.**

\*SNP selected for follow-up was not the most associated SNP in the final version of the GWAS meta-analysis. FU is risk allele frequency in controls. For GWAS, we included proportional weight given to the study, calculated from empirical variance in the imputed data.

This supplementary table is available for download as an Excel file.

**Supplementary Table 4. Subphenotype analyses at new ulcerative colitis risk loci.**

Disease location was defined using the Montreal classification system. Surgical intervention is defined as acute severe or medically refractory disease. Individuals receiving colectomy for dysplasia or malignancy were excluded. Cochran-Mantel-Haenszel tests were conducted stratifying by cohort and the Bonferroni significance threshold ( $0.05/87:P<5.75\times 10^{-4}$ ) was adopted. Subphenotype data from the Australian, German (Pittsburgh centre), Italian, Dutch, NIDDK, Norwegian, New Zealand, Swedish and WTCCC replication cohorts were included in the analysis.

|            |       |                 | P-value  |          |                       |
|------------|-------|-----------------|----------|----------|-----------------------|
|            |       |                 | E1vsE2E3 | E1E2vsE3 | Surgical intervention |
| rs734999   | 1p36  | 2.39 - 2.80     | 6.70E-01 | 9.94E-01 | 2.14E-01              |
| rs35675666 | 1p36  | 7.83 - 8.13     | 5.66E-01 | 9.15E-01 | 6.88E-01              |
| rs7524102  | 1p36  | 22.54 - 22.61   | 6.07E-01 | 2.78E-03 | 9.68E-01              |
| rs7554511  | 1q32  | 199.06 - 199.33 | NA       | NA       | NA                    |
| rs2310173  | 2q11  | 101.66 - 102.13 | 6.07E-01 | 2.50E-01 | 3.07E-02              |
| rs11676348 | 2q35  | 218.58 - 218.97 | 2.62E-01 | 1.53E-01 | 9.21E-01              |
| rs267939   | 5p15  | 10.72 - 10.90   | 9.37E-01 | 9.64E-01 | 6.62E-02              |
| rs3194051  | 5p13  | 35.83 - 36.07   | 5.09E-01 | 5.52E-01 | 8.02E-01              |
| rs6451493* | 5p13  | 40.32 - 40.85   | 8.20E-01 | 7.53E-01 | 6.75E-01              |
| rs254560   | 5q31  | 134.41 - 134.53 | 4.19E-01 | 5.18E-01 | 3.86E-01              |
| rs6871626  | 5q33  | 158.46 - 158.86 | 1.66E-01 | 8.60E-02 | 5.69E-01              |
| rs943072   | 6p21  | 43.88 - 43.92   | 5.39E-01 | 7.41E-01 | 1.41E-01              |
| rs6911490  | 6q21  | 106.51 - 106.67 | 3.96E-01 | 2.44E-01 | 4.83E-02              |
| rs6920220  | 6q23  | 137.88 - 138.17 | 4.78E-01 | 7.46E-01 | 6.22E-01              |
| rs798502   | 7p22  | 2.70 - 2.90     | 1.57E-01 | 6.06E-01 | 8.08E-01              |
| rs4728142  | 7q32  | 128.33-128.56   | 8.96E-01 | 8.42E-01 | 8.44E-01              |
| rs10758669 | 9p24  | 4.93 - 5.28     | 8.55E-01 | 1.15E-01 | 8.64E-01              |
| rs4246905  | 9q32  | 116.48 - 116.74 | 6.51E-01 | 2.32E-01 | 1.68E-01              |
| rs10781499 | 9q34  | 138.27 - 138.55 | 1.55E-03 | 1.95E-02 | 7.73E-03              |
| rs12261843 | 10p11 | 35.22 - 35.94   | 5.19E-01 | 5.29E-01 | 4.20E-01              |
| rs907611   | 11q15 | 1.82 - 1.93     | 3.08E-01 | 1.28E-01 | 6.18E-01              |
| rs2155219  | 11q13 | 75.72 - 76.02   | 4.75E-01 | 2.59E-01 | 1.91E-01              |
| rs678170   | 11q23 | 113.76 - 114.08 | 8.63E-01 | 3.53E-01 | 8.15E-01              |
| rs17085007 | 13q12 | 26.39 - 26.46   | 4.81E-01 | 8.74E-02 | 1.79E-01              |
| rs941823   | 13q13 | 39.90 - 39.95   | 4.24E-01 | 6.95E-01 | 2.70E-01              |
| rs16940202 | 16q24 | 84.53 - 84.58   | 9.55E-01 | 9.12E-02 | 1.69E-01              |
| rs2297441  | 20q13 | 61.66 - 61.98   | 9.25E-01 | 6.53E-01 | 5.97E-01              |
| rs1297265  | 21q11 | 15.62 - 15.77   | 3.30E-01 | 5.46E-01 | 2.64E-01              |
| rs2838519  | 21q22 | 44.41 - 44.52   | NA       | NA       | NA                    |

Supplementary Table 5. Ulcerative colitis risk variants correlated with eQTL.

| SNP                                                                                               | Chr | SNP Position (bp) | Probe center position (bp) | Illumina ArrayAddressID | Expression dataset | Gene                   | eQTL p-value |
|---------------------------------------------------------------------------------------------------|-----|-------------------|----------------------------|-------------------------|--------------------|------------------------|--------------|
| <b>Loci that achieved genome-wide significance (P-value&lt;5.0x10<sup>-8</sup>) in this study</b> |     |                   |                            |                         |                    |                        |              |
| rs734999                                                                                          | 1   | 2503076           | 2482955                    | 6520725                 | HT-12 + Ref-8v2    | <i>TNFRSF14</i>        | 1.04E-23     |
| rs734999                                                                                          | 1   | 2503076           | 2533115                    | 2070246                 | HT-12 + Ref-8v2    | <i>MMEL1</i>           | 1.25E-15     |
| rs734999                                                                                          | 1   | 2503076           | 2412221                    | 650452                  | HT-12              | <i>PLCH2</i>           | 1.04E-04     |
| rs734999                                                                                          | 1   | 2503076           | 2510429                    | 6250338                 | Ref-8v2            | <i>C1orf93</i>         | 1.24E-04     |
| rs11676348                                                                                        | 2   | 218718391         | 218737887                  | 3440669                 | HT-12 + Ref-8v2    | <i>IL8RA</i>           | 1.28E-30     |
| rs11676348                                                                                        | 2   | 218718391         | 218962428                  | 780465                  | HT-12 + Ref-8v2    | <i>SLC11A1</i>         | 9.39E-14     |
| rs11676348                                                                                        | 2   | 218718391         | 218704605                  | 2900327                 | HT-12              | <i>IL8RB</i>           | 1.07E-10     |
| rs11676348                                                                                        | 2   | 218718391         | 218838153                  | 2940068                 | HT-12 + Ref-8v2    | <i>AAMP</i>            | 2.04E-10     |
| rs11676348                                                                                        | 2   | 218718391         | 218704605                  | 2710437                 | Ref-8v2            | <i>IL8RB</i>           | 4.66E-09     |
| rs11676348                                                                                        | 2   | 218718391         | 218838153                  | 5560079                 | HT-12              | <i>AAMP</i>            | 2.74E-08     |
| rs11676348                                                                                        | 2   | 218718391         | 218808721                  | 7160327                 | HT-12 + Ref-8v2    | <i>ARPC2</i>           | 1.60E-04     |
| rs2310173                                                                                         | 2   | 102030060         | 101993025                  | 1740451                 | HT-12 + Ref-8v2    | <i>IL1R2</i>           | 1.53E-04     |
| rs267939                                                                                          | 5   | 10805315          | 10773346                   | 2710491                 | HT-12              | <i>DAP</i>             | 2.59E-12     |
| rs267939                                                                                          | 5   | 10805315          | 10773346                   | 3460201                 | Ref-8v2            | <i>DAP</i>             | 3.52E-06     |
| rs3194051                                                                                         | 5   | 35912031          | 35902713                   | 3830349                 | HT-12              | <i>IL7R</i>            | 3.74E-03     |
| rs798502                                                                                          | 7   | 2756406           | 2792378                    | 670082                  | HT-12              | <i>GNA12</i>           | 1.13E-26     |
| rs798502                                                                                          | 7   | 2756406           | 2792378                    | 4070259                 | HT-12              | <i>GNA12</i>           | 2.19E-06     |
| rs798502                                                                                          | 7   | 2756406           | 2792378                    | 7150465                 | HT-12 + Ref-8v2    | <i>GNA12</i>           | 5.15E-05     |
| rs4728142                                                                                         | 7   | 128361203         | 128371275                  | 2230431                 | HT-12 + Ref-8v2    | <i>IRF5</i>            | 1.31E-87     |
| rs4728142                                                                                         | 7   | 128361203         | 128371275                  | 4260373                 | HT-12 + Ref-8v2    | <i>IRF5</i>            | 1.30E-85     |
| rs4728142                                                                                         | 7   | 128361203         | 128432309                  | 3360241                 | HT-12 + Ref-8v2    | <i>TNPO3</i>           | 2.40E-35     |
| rs4728142                                                                                         | 7   | 128361203         | 128432309                  | 6650730                 | Ref-8v2            | <i>TNPO3</i>           | 3.98E-05     |
| rs10781499                                                                                        | 9   | 138386226         | 138380104                  | 3060494                 | HT-12 + Ref-8v2    | <i>CARD9</i>           | 3.08E-112    |
| rs10781499                                                                                        | 9   | 138386226         | 138448486                  | 3370255                 | HT-12 + Ref-8v2    | <i>INPP5E</i>          | 7.84E-71     |
| rs10781499                                                                                        | 9   | 138386226         | 138420539                  | 60706                   | HT-12              | <i>SDCCAG3</i>         | 5.08E-09     |
| rs10781499                                                                                        | 9   | 138386226         | 138460826                  | 2600343                 | HT-12              | <i>INPP5E//SEC16A</i>  | 4.38E-06     |
| rs10781499                                                                                        | 9   | 138386226         | 138420539                  | 7040553                 | HT-12 + Ref-8v2    | <i>SDCCAG3</i>         | 1.84E-03     |
| rs10781499                                                                                        | 9   | 138386226         | 138401461                  | 2070195                 | HT-12 + Ref-8v2    | <i>SNAPC4</i>          | 2.27E-03     |
| rs4246905                                                                                         | 9   | 116593070         | 116718768                  | 1240209                 | HT-12 + Ref-8v2    | <i>TNFSF8</i>          | 1.77E-13     |
| rs12261843                                                                                        | 10  | 35594060          | 35738408                   | 5310605                 | HT-12              | <i>CCNY</i>            | 9.20E-04     |
| rs907611                                                                                          | 11  | 1830648           | 1850422                    | 5720192                 | Ref-8v2            | <i>LSP1</i>            | 1.12E-03     |
| rs907611                                                                                          | 11  | 1830648           | 1850422                    | 4180068                 | HT-12              | <i>LSP1</i>            | 3.45E-03     |
| rs2297441                                                                                         | 20  | 61798026          | 61841706                   | 6420450                 | HT-12              | <i>SLC2A4RG</i>        | 7.91E-41     |
| rs2297441                                                                                         | 20  | 61798026          | 61748369                   | 4260379                 | Ref-8v2            | <i>STMN3</i>           | 2.27E-09     |
| rs2297441                                                                                         | 20  | 61798026          | 61866501                   | 7040521                 | HT-12 + Ref-8v2    | <i>SLC2A4RG/ZBTB46</i> | 2.15E-03     |
| rs2297441                                                                                         | 20  | 61798026          | 61831773                   | 5490390                 | HT-12 + Ref-8v2    | <i>ZGPAT</i>           | 2.54E-03     |



Meta-analysis identifies 29 additional ulcerative colitis risk loci  
Anderson et al.

| SNP                                                                                                   | Chr | SNP Position (bp) | Probe center position (bp) | Illumina ArrayAddressID | Expression dataset | Gene                      | eQTL p-value |
|-------------------------------------------------------------------------------------------------------|-----|-------------------|----------------------------|-------------------------|--------------------|---------------------------|--------------|
| <b>Loci that achieved genome-wide significance (P-value&lt;5x10<sup>-8</sup>) in previous studies</b> |     |                   |                            |                         |                    |                           |              |
| rs1801274                                                                                             | 1   | 159746369         | 159907075                  | 6650341                 | HT-12 + Ref-8v2    | <i>FCGR2B</i>             | 9.55E-09     |
| rs1801274                                                                                             | 1   | 159746369         | 159907075                  | 2480717                 | HT-12              | <i>FCGR2B</i>             | 1.65E-05     |
| rs1801274                                                                                             | 1   | 159746369         | 159748914                  | 450762                  | HT-12              | <i>FCGR2A</i>             | 2.44E-04     |
| rs1801274                                                                                             | 1   | 159746369         | 159907075                  | 7550215                 | HT-12              | <i>FCGR2B</i>             | 7.12E-04     |
| rs1801274                                                                                             | 1   | 159746369         | 159761982                  | 160092                  | HT-12 + Ref-8v2    | <i>HSPA6</i>              | 3.83E-03     |
| rs1801274                                                                                             | 1   | 159746369         | 159802528                  | 1710553                 | HT-12 + Ref-8v2    | <i>HSPA6</i>              | 5.33E-03     |
| rs9822268                                                                                             | 3   | 49694733          | 49819298                   | 2850202                 | HT-12 + Ref-8v2    | <i>UBA7</i>               | 3,88E-43     |
| rs9822268                                                                                             | 3   | 49694733          | 49694969                   | 450475                  | HT-12 + Ref-8v2    | <i>MST1/APEH</i>          | 6,76E-09     |
| rs9822268                                                                                             | 3   | 49694733          | 49728648                   | 6020228                 | HT-12 + Ref-8v2    | <i>RNF123/AMIQ3/GMPPB</i> | 1,22E-03     |
| rs11739663                                                                                            | 5   | 647083            | 508370                     | 4730682                 | HT-12 + Ref-8v2    | <i>EXOC3</i>              | 3.76E-04     |
| rs9268853                                                                                             | 6   | 32537621          | 32768214                   | 780403                  | HT-12              | <i>HLA-DQA1/HLA-DQA2</i>  | 2.91E-37     |
| rs9268853                                                                                             | 6   | 32537621          | 32599600                   | 6370315                 | HT-12 + Ref-8v2    | <i>HLA-DRB5</i>           | 9.24E-30     |
| rs9268853                                                                                             | 6   | 32537621          | 32518213                   | 2570564                 | HT-12              | <i>HLA-DRA</i>            | 1.18E-12     |
| rs9268853                                                                                             | 6   | 32537621          | 32660052                   | 5260484                 | HT-12 + Ref-8v2    | <i>HLA-DRB1</i>           | 2.07E-08     |
| rs9268853                                                                                             | 6   | 32537621          | 32627630                   | 2070608                 | HT-12              | <i>HLA-DRB5/HLA-DRB1</i>  | 5.04E-08     |
| rs6499188                                                                                             | 16  | 67232289          | 67144627                   | 5900286                 | HT-12 + Ref-8v2    | <i>ZFP90</i>              | 2,63E-117    |
| rs2872507                                                                                             | 17  | 35294289          | 35321401                   | 6270615                 | HT-12 + Ref-8v2    | <i>GSDMB</i>              | 2.72E-189    |
| rs2872507                                                                                             | 17  | 35294289          | 35321401                   | 5390608                 | HT-12              | <i>GSDMB</i>              | 1.26E-77     |
| rs2872507                                                                                             | 17  | 35294289          | 35334101                   | 1500112                 | HT-12 + Ref-8v2    | <i>ORMDL3</i>             | 3.97E-68     |
| rs2872507                                                                                             | 17  | 35294289          | 35224345                   | 6380411                 | HT-12              | <i>IKZF3</i>              | 1.53E-11     |
| rs2872507                                                                                             | 17  | 35294289          | 35084188                   | 2000441                 | HT-12 + Ref-8v2    | <i>PNMT/PERLD1</i>        | 2.10E-10     |
| rs6017342                                                                                             | 20  | 42498442          | 42571209                   | 7380139                 | Ref-8v2            | <i>SERINC3</i>            | 8.92E-05     |
| rs2838519                                                                                             | 21  | 44439451          | 44444959                   | 150484                  | HT-12              | -                         | 1.04E-03     |
| rs5771069                                                                                             | 22  | 48777607          | 48741943                   | 2190452                 | HT-12 + Ref-8v2    | <i>PIM3</i>               | 1.42E-11     |
| rs5771069                                                                                             | 22  | 48777607          | 48956068                   | 4070300                 | HT-12 + Ref-8v2    | <i>PANX2</i>              | 1.01E-07     |

**Supplementary Table 6. Ulcerative colitis risk variants correlated ( $r^2 > 0.5$ ) with non-synonymous and splice-site disrupting SNPs.**

Data taken from 1000 Genomes Project March 2010 release

(<ftp://ftp.sanger.ac.uk/pub/1000genomes/REL-1005/QCALL/>).

| Lead SNP |            |                 |           | Non-synonymous/Splice SNP |                 |                           |       |                 |                         |
|----------|------------|-----------------|-----------|---------------------------|-----------------|---------------------------|-------|-----------------|-------------------------|
| CHR      | dbSNP ID   | POS (dbSNP 130) | RAF       | dbSNP ID                  | POS (dbSNP 130) | Distance to lead SNP (bp) | $r^2$ | Gene            | Amino acid substitution |
| 1p36     | rs734999   | 2503076         | C - 0.531 | rs3748816                 | 2516606         | 13530                     | 0.55  | <i>MMEL1</i>    | M518T                   |
| 1p36     | rs35675666 | 7944560         | G - 0.829 | rs13306061                | 7836032         | 108528                    | 0.52  | <i>UTS2</i>     | R16Q                    |
| 1p36     | rs35675666 | 7944560         | G - 0.829 | rs34305100                | 7835616         | 108944                    | 0.52  | <i>UTS2</i>     | I12T                    |
| 5p13     | rs3194051  | 35912031        | G - 0.267 | SAME                      |                 |                           |       | <i>IL7R</i>     | I356V                   |
| 7p22     | rs798502   | 2756406         | A - 0.710 | rs798488                  | 2769048         | 12642                     | 0.87  | <i>GNA12</i>    | M1V                     |
| 7p22     | rs798502   | 2756406         | A - 0.710 | rs2644275                 | 2820536         | 64130                     | 0.55  | <i>GNA12</i>    | T23I                    |
| 9q32     | rs4246905  | 116593070       | C - 0.715 | SAME                      |                 |                           |       | <i>TNFSF15</i>  | H3R                     |
| 9q34     | rs10781499 | 138386226       | A - 0.425 | rs4077515                 | 138386317       | 91                        | 1.00  | <i>CARD9</i>    | S12N                    |
| 9q34     | rs10781499 | 138386226       | A - 0.425 | rs3812571                 | 138395115       | 8889                      | 0.69  | <i>SNAPC4</i>   | H799Q                   |
| 20q13    | rs2297441  | 61798026        | A - 0.768 | rs3208008                 | 61796554        | 1472                      | 1.00  | <i>RTEL1</i>    | Q1042H                  |
| 20q13    | rs2297441  | 61798026        | A - 0.768 | rs2257440                 | 61798711        | 685                       | 0.95  | <i>RTEL1</i>    | R1352C                  |
| 1p31     | rs11209026 | 67478546        | G - 0.935 | SAME                      |                 |                           |       | <i>IL23R</i>    | R381Q                   |
| 1q23     | rs1801274  | 159746369       | A - 0.506 | SAME                      |                 |                           |       | <i>FCGR2A</i>   | H167R                   |
| 3p21     | rs3197999  | 49696536        | A - 0.298 | SAME                      |                 |                           |       | <i>MST1</i>     | R689C                   |
| 3p21     | rs3197999  | 49696536        | A - 0.298 | rs34762726                | 49664214        | 32322                     | 0.90  | <i>BSN</i>      | A741T                   |
| 6p21     | rs9268853  | 32537621        | T - 0.661 | rs2076523                 | 32478813        | 58808                     | 0.57  | <i>BTNL2</i>    | K196E                   |
| 6p21     | rs9268853  | 32537621        | T - 0.661 | rs34624872                | 32656606        | 118985                    | 0.54  | <i>HLA-DRB1</i> | R220W                   |
| 6p21     | rs9268853  | 32537621        | T - 0.661 | rs1059352                 | 32657503        | 119882                    | 0.56  | <i>HLA-DRB1</i> | G154A                   |
| 6p21     | rs9268853  | 32537621        | T - 0.661 | rs29029549                | 32659906        | 122285                    | 0.68  | <i>HLA-DRB1</i> | H110Y                   |
| 6p21     | rs9268853  | 32537621        | T - 0.661 | rs1047989                 | 32713235        | 175614                    | 0.53  | <i>HLA-DQA1</i> | L8M                     |
| 6p21     | rs9268853  | 32537621        | T - 0.661 | rs1142333                 | 32717242        | 179621                    | 0.52  | <i>HLA-DQA1</i> | R87T                    |
| 6p21     | rs9268853  | 32537621        | T - 0.661 | rs1064944                 | 32717277        | 179656                    | 0.54  | <i>HLA-DQA1</i> | M99L/V                  |
| 6p21     | rs9268853  | 32537621        | T - 0.661 | rs2308891                 | 32717987        | 180366                    | 0.55  | <i>HLA-DQA1</i> | Q198K/E                 |
| 6p21     | rs9268853  | 32537621        | T - 0.661 | rs9272774                 | 32718233        | 180612                    | 0.58  | <i>HLA-DQA1</i> | SPLICE                  |
| 17q12    | rs2872507  | 35294289        | A - 0.462 | rs11557467                | 35282160        | 12129                     | 0.84  | <i>ZBPB2</i>    | S151I                   |
| 17q12    | rs2872507  | 35294289        | A - 0.462 | rs2305480                 | 35315722        | 21433                     | 1.00  | <i>GSDMB</i>    | P243S                   |
| 17q12    | rs2872507  | 35294289        | A - 0.462 | rs2305479                 | 35315743        | 21454                     | 0.91  | <i>GSDMB</i>    | G282R                   |
| 17q12    | rs2872507  | 35294289        | A - 0.462 | rs11078928                | 35317995        | 23706                     | 1.00  | <i>GSDMB</i>    | SPLICE                  |
| 22q13    | rs5771069  | 48777607        | G - 0.505 | SAME                      |                 |                           |       | <i>IL17REL</i>  | L333P                   |
| 22q13    | rs5771069  | 48777607        | G - 0.505 | rs9617090                 | 48781321        | 3714                      | 0.80  | <i>IL17REL</i>  | G70R                    |

**Supplementary Table 7. Summary of candidate genes mapping from *in silico* analysis on the 47 UC loci.**

GRAIL results, based on HapMap release 21, are presented if a gene had a  $P < 0.01$  and resides within the association boundaries. eQTL analyses were based on the Dubois *et al.* dataset<sup>11</sup> (see **Online Methods**). Positional candidate denotes the gene in which the SNP resides. Regional association plots are shown in **Supplementary Figure 2** and study-specific results are shown in **Supplementary Table 3a**. **Supplementary Tables 4 and 5** contain detailed eQTL and non-synonymous SNP results, respectively.

*This supplementary table is available for download as an Excel file.*

**Supplementary Table 8. Results from a functional enrichment analysis across all loci associated with UC susceptibility (see Supplementary Figure 3).**

| Annotated gene sets (featured in enrichment network map)    | p        | Candidate genes                                                                                                                                                                                                                                              |
|-------------------------------------------------------------|----------|--------------------------------------------------------------------------------------------------------------------------------------------------------------------------------------------------------------------------------------------------------------|
| MSigDB HSA04060_CYTOKINE_CYTOKINE_RECEPTOR_INTERACTION      | 2.91E-10 | <i>CSF3, IFNG, IL10, IL12B, IL19, IL1R1, IL1R2, IL2, IL20, IL21, IL22, IL23R, IL26, IL7R, TNFRSF14, TNFRSF6B, TNFRSF9, TNFSF15, TNFSF8</i>                                                                                                                   |
| GO_MF IgG binding                                           | 4.72E-09 | <i>FCGR2A, FCGR2B, FCGR3A, FCGR3B, FCGR2C</i>                                                                                                                                                                                                                |
| GO_MF cytokine activity                                     | 4.21E-08 | <i>TNFSF8, CSF3, IFNG, IL2, IL10, IL12B, TNFSF15, IL19, IL20, IL22, IL26, IL21</i>                                                                                                                                                                           |
| MSigDB HSA04630_JAK_STAT_SIGNALING_PATHWAY                  | 6.79E-08 | <i>CSF3, IFNG, IL10, IL12B, IL19, IL2, IL20, IL21, IL22, IL23R, IL26, IL7R, JAK2</i>                                                                                                                                                                         |
| MSigDB INFLAMPATHWAY                                        | 3.43E-05 | <i>CSF3, IFNG, IL10, IL12B, IL2</i>                                                                                                                                                                                                                          |
| MSigDB IL18PATHWAY                                          | 4.47E-05 | <i>IFNG, IL12B, IL2</i>                                                                                                                                                                                                                                      |
| Pnthr_BP macrophage activation                              | 5.32E-05 | <i>FCGR3B, IL12B, TNFRSF9, IFNG, FCGR2A, FCGR2B, AAMP, IL20, TNFRSF14, IL10, FCGR3A, IL19, TNFSF15</i>                                                                                                                                                       |
| GO_BP positive regulation of activated T cell proliferation | 1.06E-04 | <i>IL2, IL12B, ICOSLG</i>                                                                                                                                                                                                                                    |
| MSigDB CYTOKINEPATHWAY                                      | 1.21E-04 | <i>IFNG, IL10, IL12B, IL2</i>                                                                                                                                                                                                                                |
| MSigDB ST_INTERFERON_GAMMA_PATHWAY                          | 1.82E-04 | <i>IFNG, JAK2, PLA2G2A</i>                                                                                                                                                                                                                                   |
| Pnthr_BP response to stimulus                               | 3.45E-04 | <i>FCGR3B, NR1D1, IL23R, IL12B, XPO1, TNFRSF9, ICOSLG, IFNG, GPR35, IL2, PNKD, ADAD1, FCGR2A, SLC11A1, CRKRS, MAPKAPK2, PRKAA1, IL8RB, REL, PARK7, FCGR2B, AAMP, CSF3, IL1R1, AHS2, IL20, TNFRSF14, CREM, IRF5, IL10, FCGR3A, IL19, TNFSF15, JAK2, HSPA6</i> |
| Pnthr_BP natural killer cell activation                     | 3.52E-04 | <i>FCGR3B, IL12B, IFNG, FCGR2A, FCGR2B, FCGR3A, TNFSF15</i>                                                                                                                                                                                                  |
| GO_BP positive regulation of cytokine secretion             | 3.89E-04 | <i>IL10, TNFSF15, IL26</i>                                                                                                                                                                                                                                   |
| Pnthr_BP immune response                                    | 3.98E-04 | <i>FCGR3B, IL12B, IL23R, XPO1, TNFRSF9, ADAD1, IFNG, FCGR2A, IL8RB, FCGR2B, REL, IL20, CSF3, TNFRSF14, IRF5, IL10, FCGR3A, IL19, TNFSF15</i>                                                                                                                 |
| MSigDB NO2IL12PATHWAY                                       | 9.32E-04 | <i>IFNG, IL12B, JAK2</i>                                                                                                                                                                                                                                     |
| Pnthr_BP B cell mediated immunity                           | 1.03E-03 | <i>FCGR3B, IL23R, XPO1, TNFRSF9, FCGR2A, REL, FCGR2B, TNFRSF14, FCGR3A, TNFSF15</i>                                                                                                                                                                          |
| GO_BP positive regulation of cell adhesion                  | 1.09E-03 | <i>ERBB2, IFNG, IL12B</i>                                                                                                                                                                                                                                    |
| MSigDB TH1TH2PATHWAY                                        | 1.37E-03 | <i>IFNG, IL12B, IL2</i>                                                                                                                                                                                                                                      |
| MSigDB 41BBPATHWAY                                          | 1.62E-03 | <i>IFNG, IL2, TNFRSF9</i>                                                                                                                                                                                                                                    |
| MSigDB DCPATHWAY                                            | 2.57E-03 | <i>IFNG, IL10, IL12B</i>                                                                                                                                                                                                                                     |
| MSigDB IL12PATHWAY                                          | 2.95E-03 | <i>IFNG, IL12B, JAK2</i>                                                                                                                                                                                                                                     |
| MSigDB NKTPATHWAY                                           | 5.93E-03 | <i>IFNG, IL12B, IL2</i>                                                                                                                                                                                                                                      |
| Pnthr_BP response to interferon-gamma                       | 8.50E-03 | <i>IL12B, IFNG, ADAD1, IRF5, TNFSF15</i>                                                                                                                                                                                                                     |
| MSigDB HSA04940_TYPE_I_DIABETES_MELLITUS                    | 1.94E-02 | <i>IFNG, IL12B, IL2</i>                                                                                                                                                                                                                                      |
| Pnthr_BP cell-cell signaling                                | 2.62E-02 | <i>ERBB2, NOTCH1, CACNA1S, UTS2, INSL4, IL12B, NR1D1, IL23R, SMPD3, TNFRSF9, IFNG, GPR25, IL2, MAPKAPK2, CRELD2, IL20, CSF3, GPM1, TNFRSF14, IL10, IL19, TNFSF15, JAK2</i>                                                                                   |
| MSigDB CALCINEURIN_NF_AT_SIGNALING                          | 3.41E-02 | <i>FCGR3A, IFNG, IL10, IL2</i>                                                                                                                                                                                                                               |

**Supplementary Table 9. Results from the International IBD Genetics Consortium CD and UC meta-analyses for the 99 loci reported for association in CD and/or UC.**

All 99 loci reported as reaching  $P < 5 \times 10^{-8}$  in either CD and/or UC (follow-up included, data not shown here) are listed. From those loci, 71 are reported in CD and 47 are reported in UC, including an overlap of 19 loci reported in both studies. The overlapping loci between both diseases are those with overlapping physical intervals. For those 19 loci showing association signal at genome-wide significance in both CD and UC, the best index SNP in each scan is provided if these differ. The  $r^2$  and  $D'$  between the two index SNPs is listed under the CD SNP. FU gives the allele frequency in controls while LB95 and UB95 respectively gives lower and upper bound of the 95% confidence interval on OR.

*This supplementary table is available for download as an Excel file.*

**Supplementary Figure 1. Quantile-Quantile plots of observed vs. expected chi-square statistics for the nine constituent genome-wide scans and the meta-analysis (SCAN).** For a detailed description of the GWAS cohorts see **Supplementary Table 1**. SNPs with an observed test-statistic greater than 25 are represented by triangles at the top of each plot.

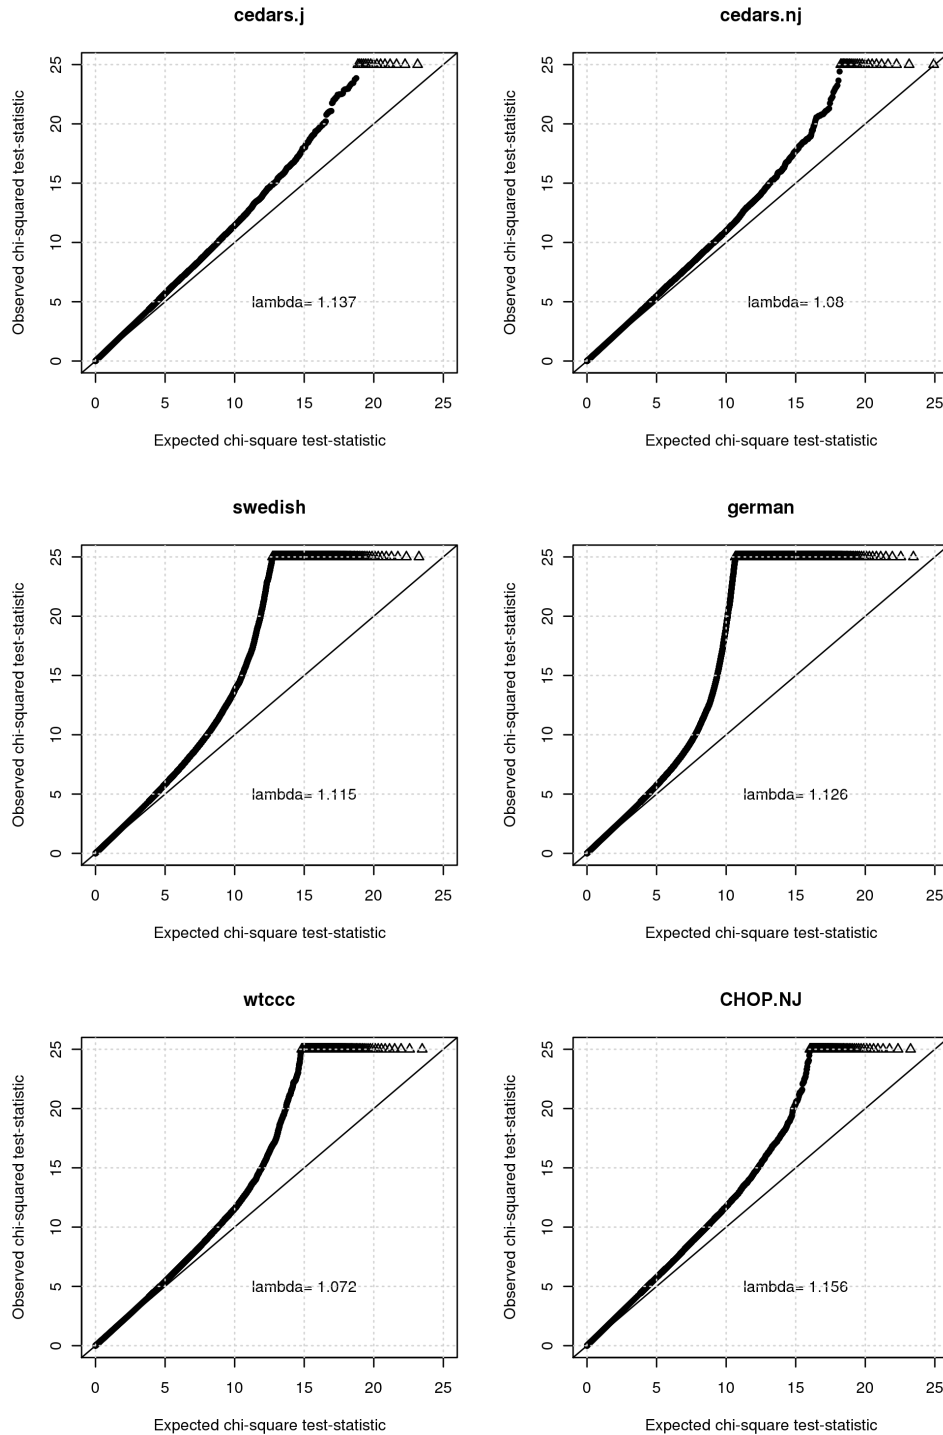

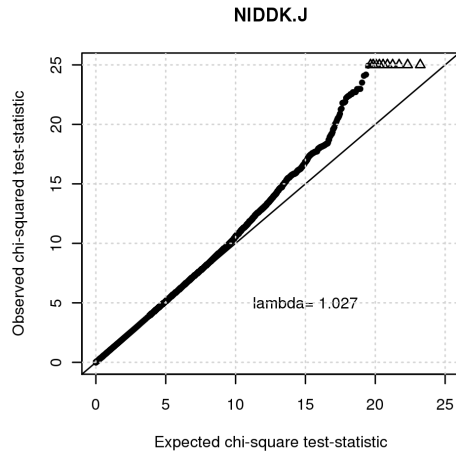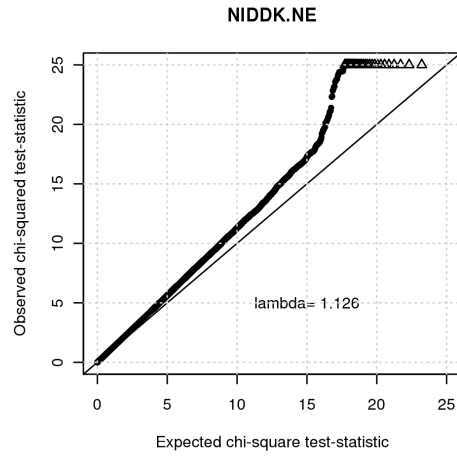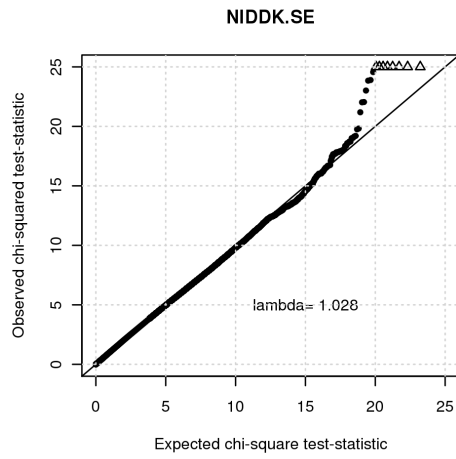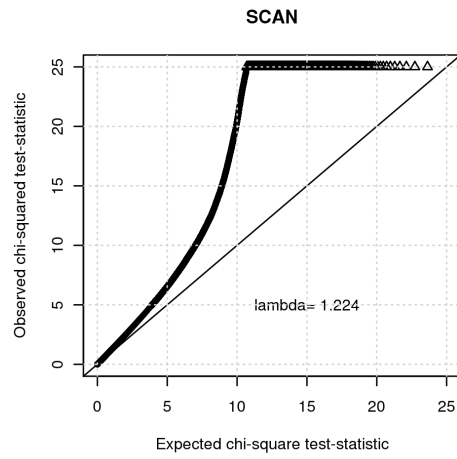

**Supplementary Figure 2. Locus wide association plots for all 47 UC loci, generated using SNAP<sup>39</sup>.**

Where the locus is greater than 1Mb we show 500Kb either side of the most associated SNP. P-values are given for the meta-analysis only.

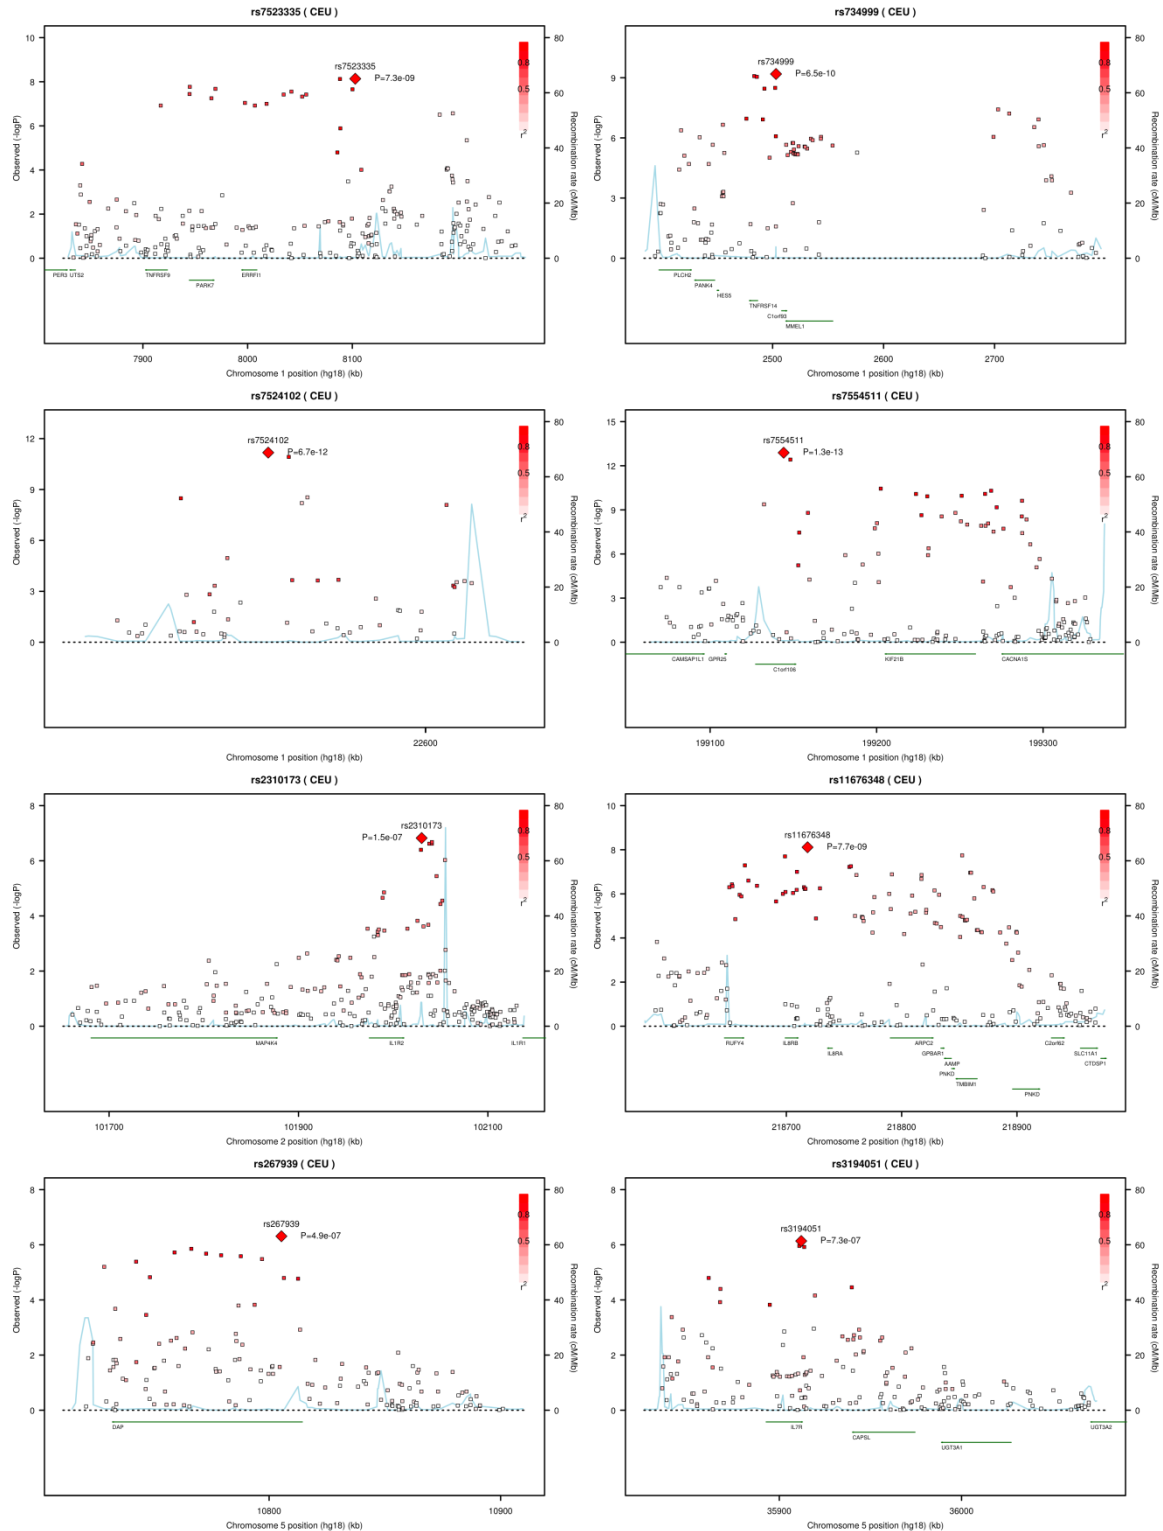



Meta-analysis identifies 29 additional ulcerative colitis risk loci  
Anderson et al.

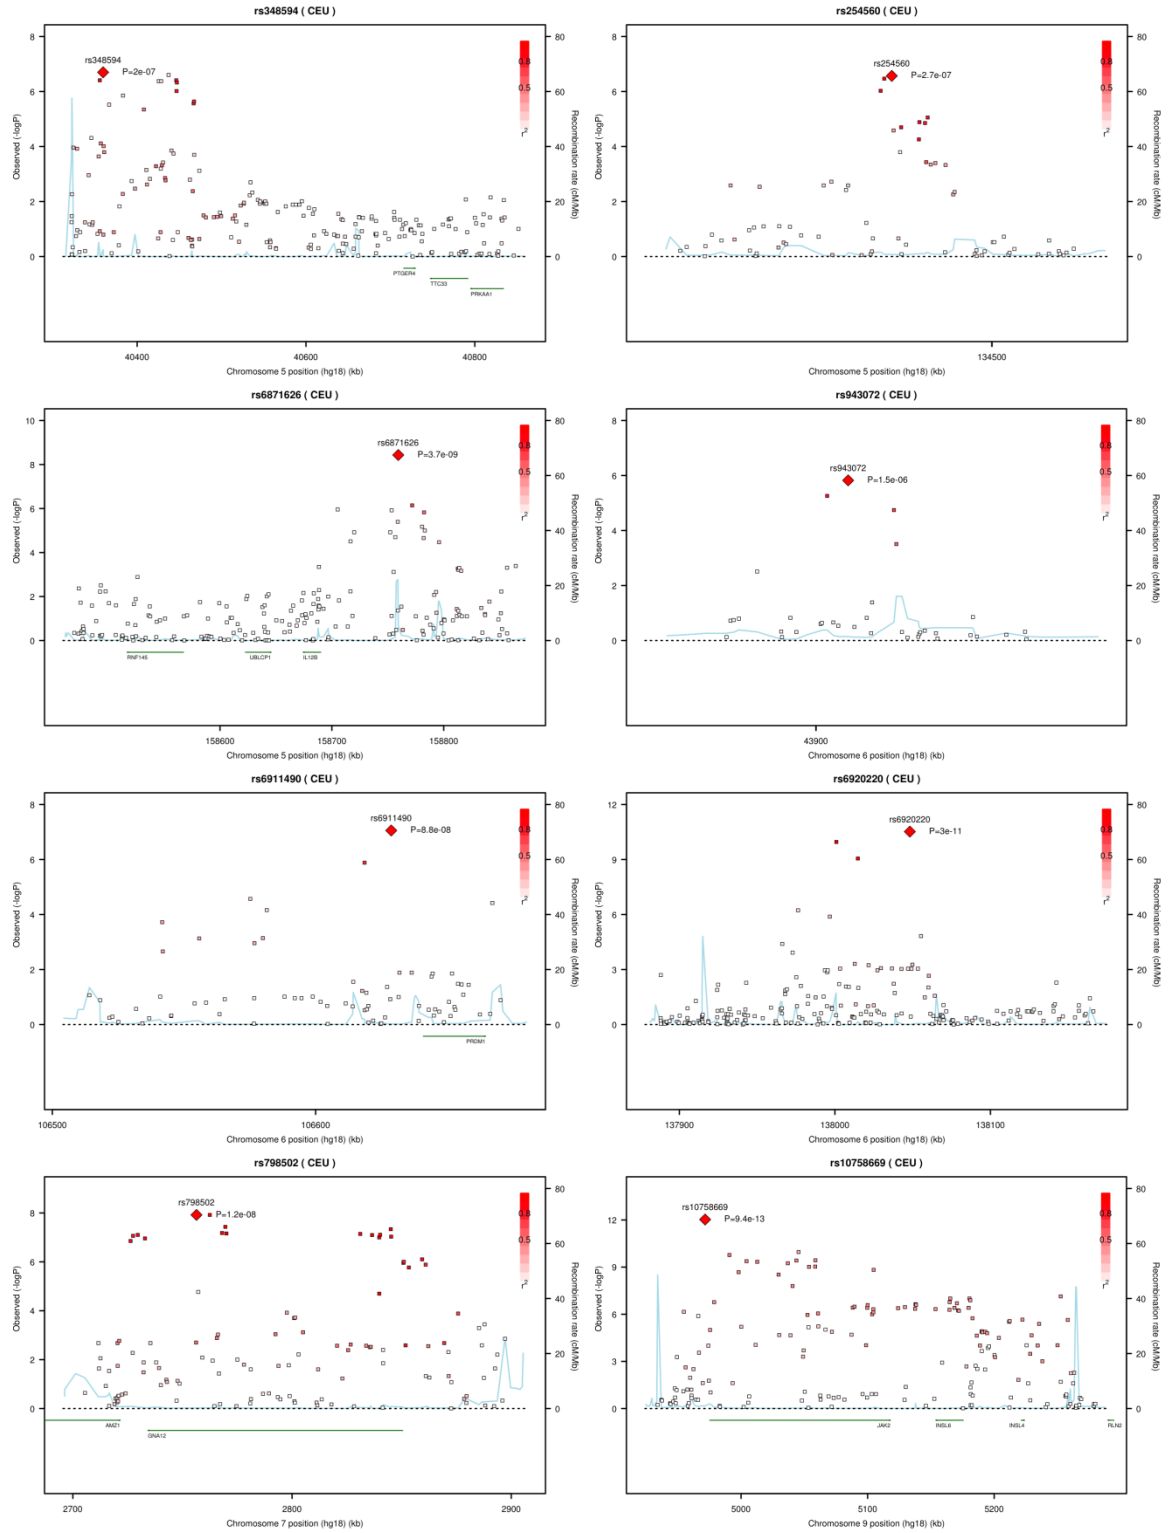

Meta-analysis identifies 29 additional ulcerative colitis risk loci  
Anderson et al.

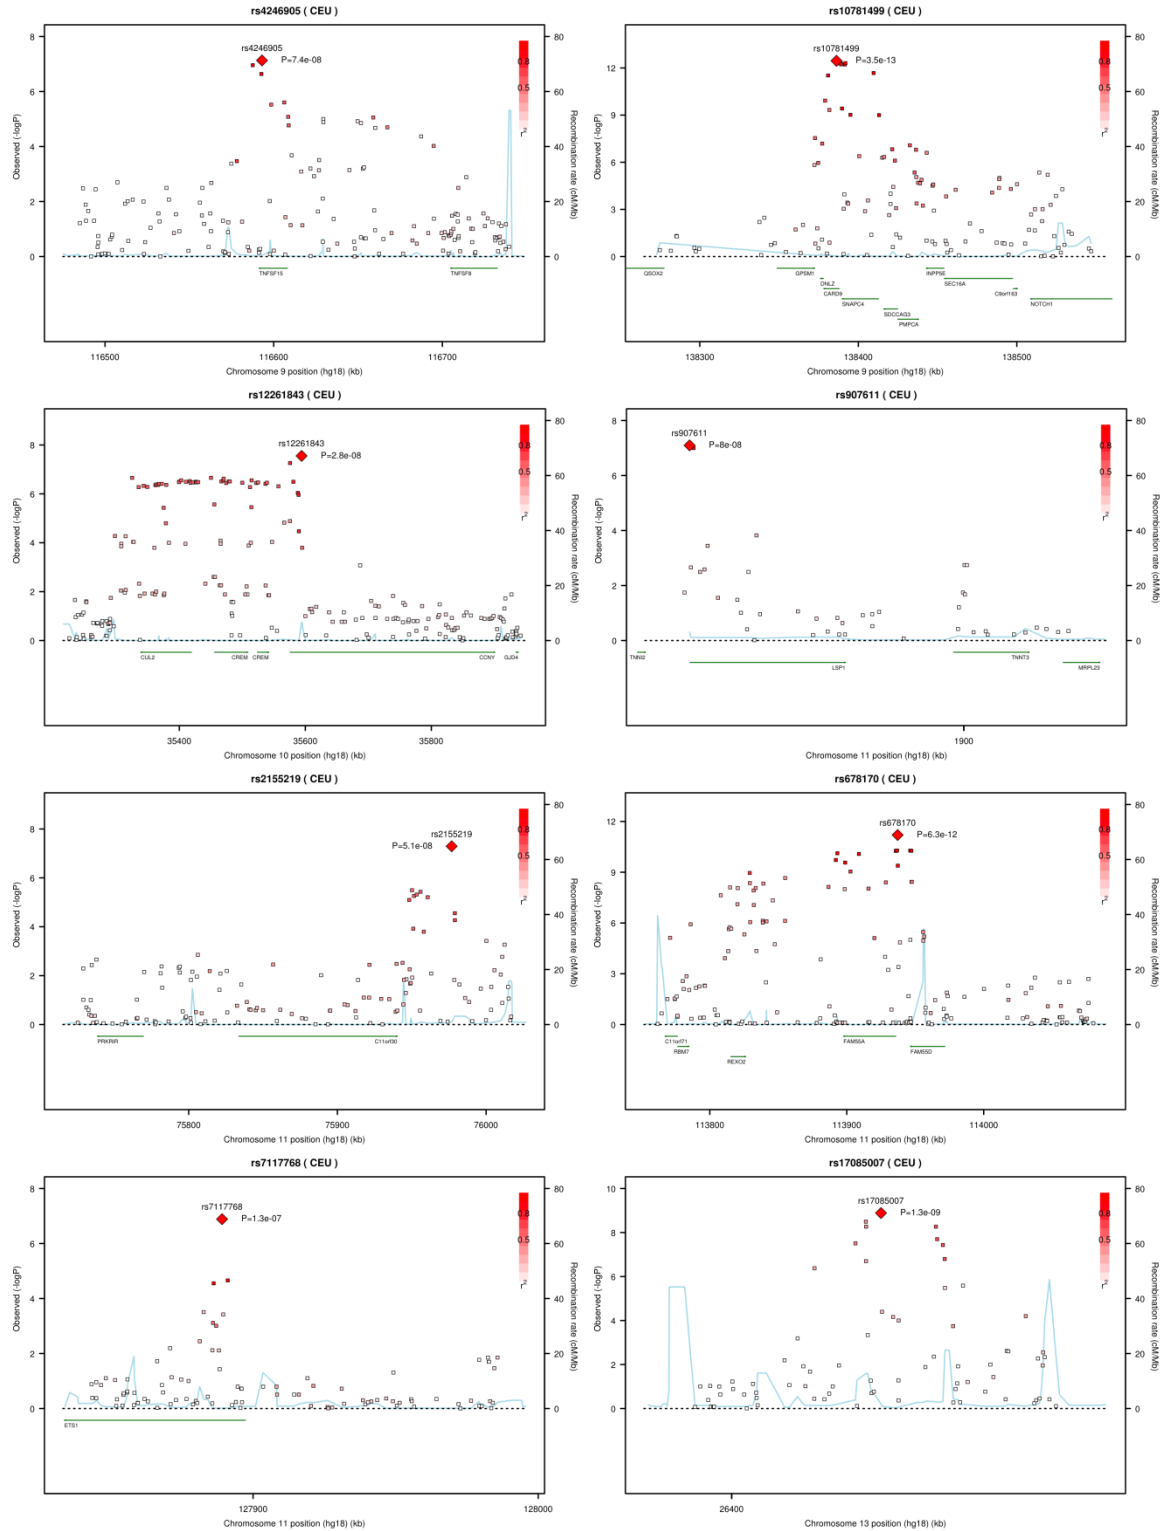

Meta-analysis identifies 29 additional ulcerative colitis risk loci  
Anderson et al.

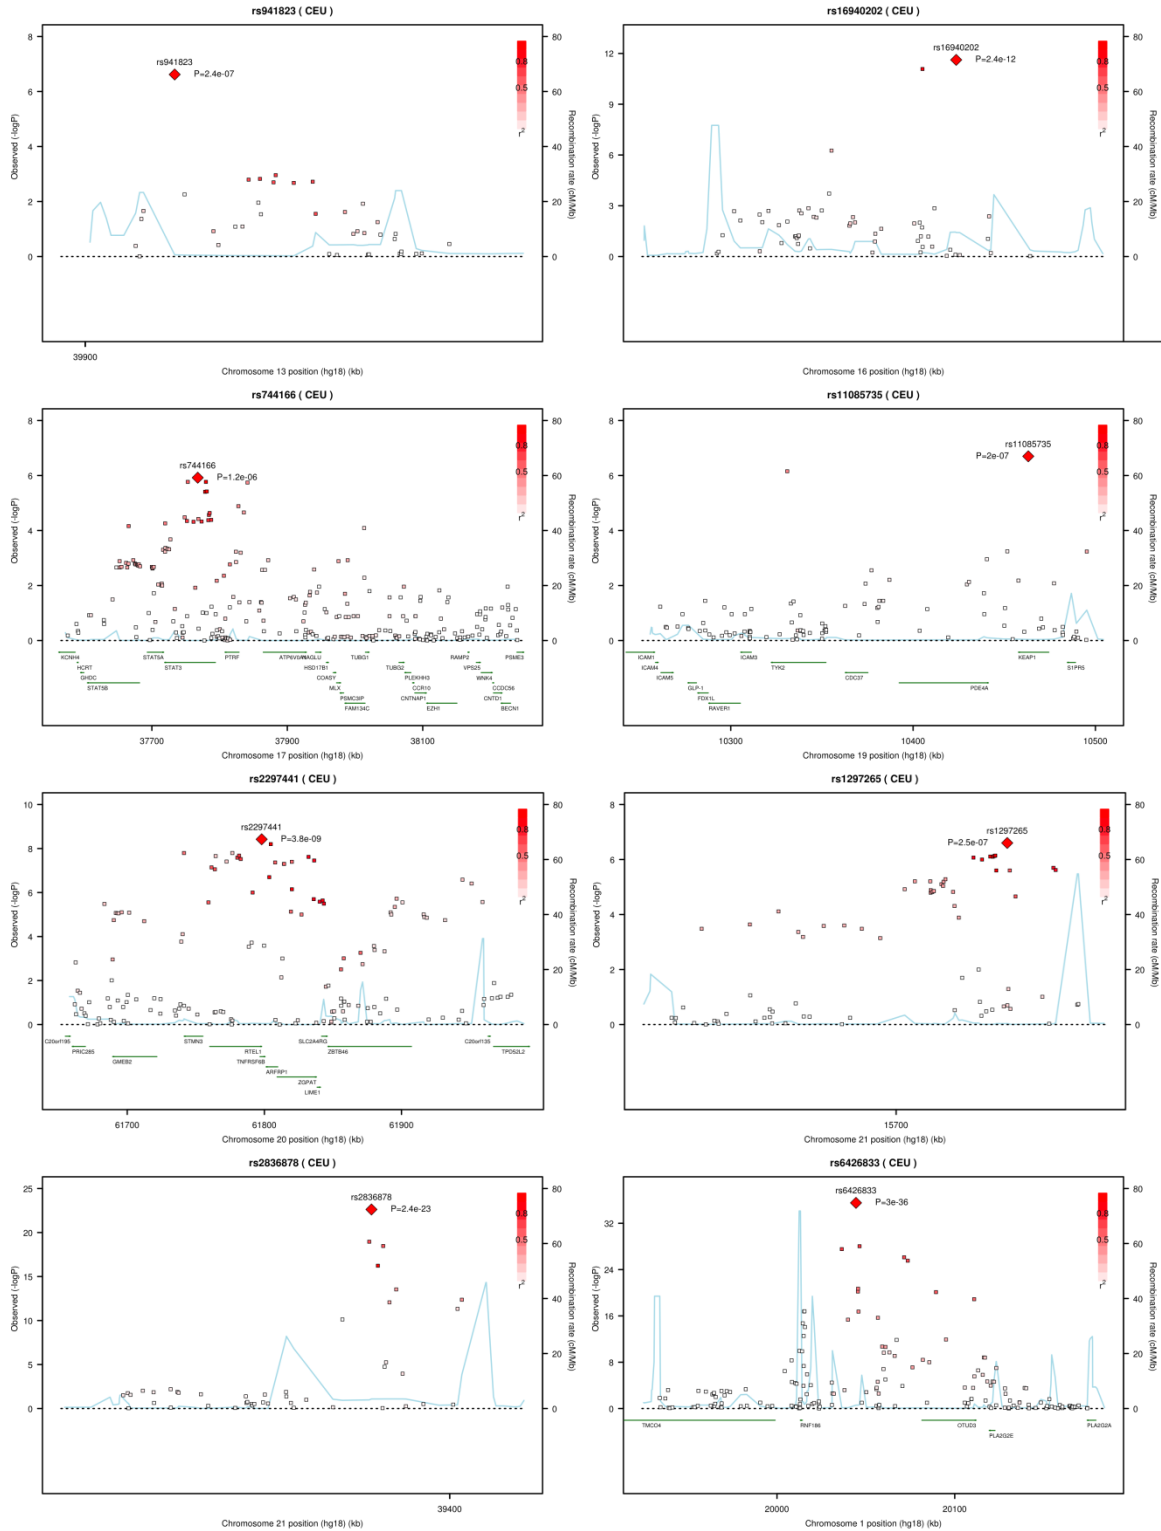

Meta-analysis identifies 29 additional ulcerative colitis risk loci  
Anderson et al.

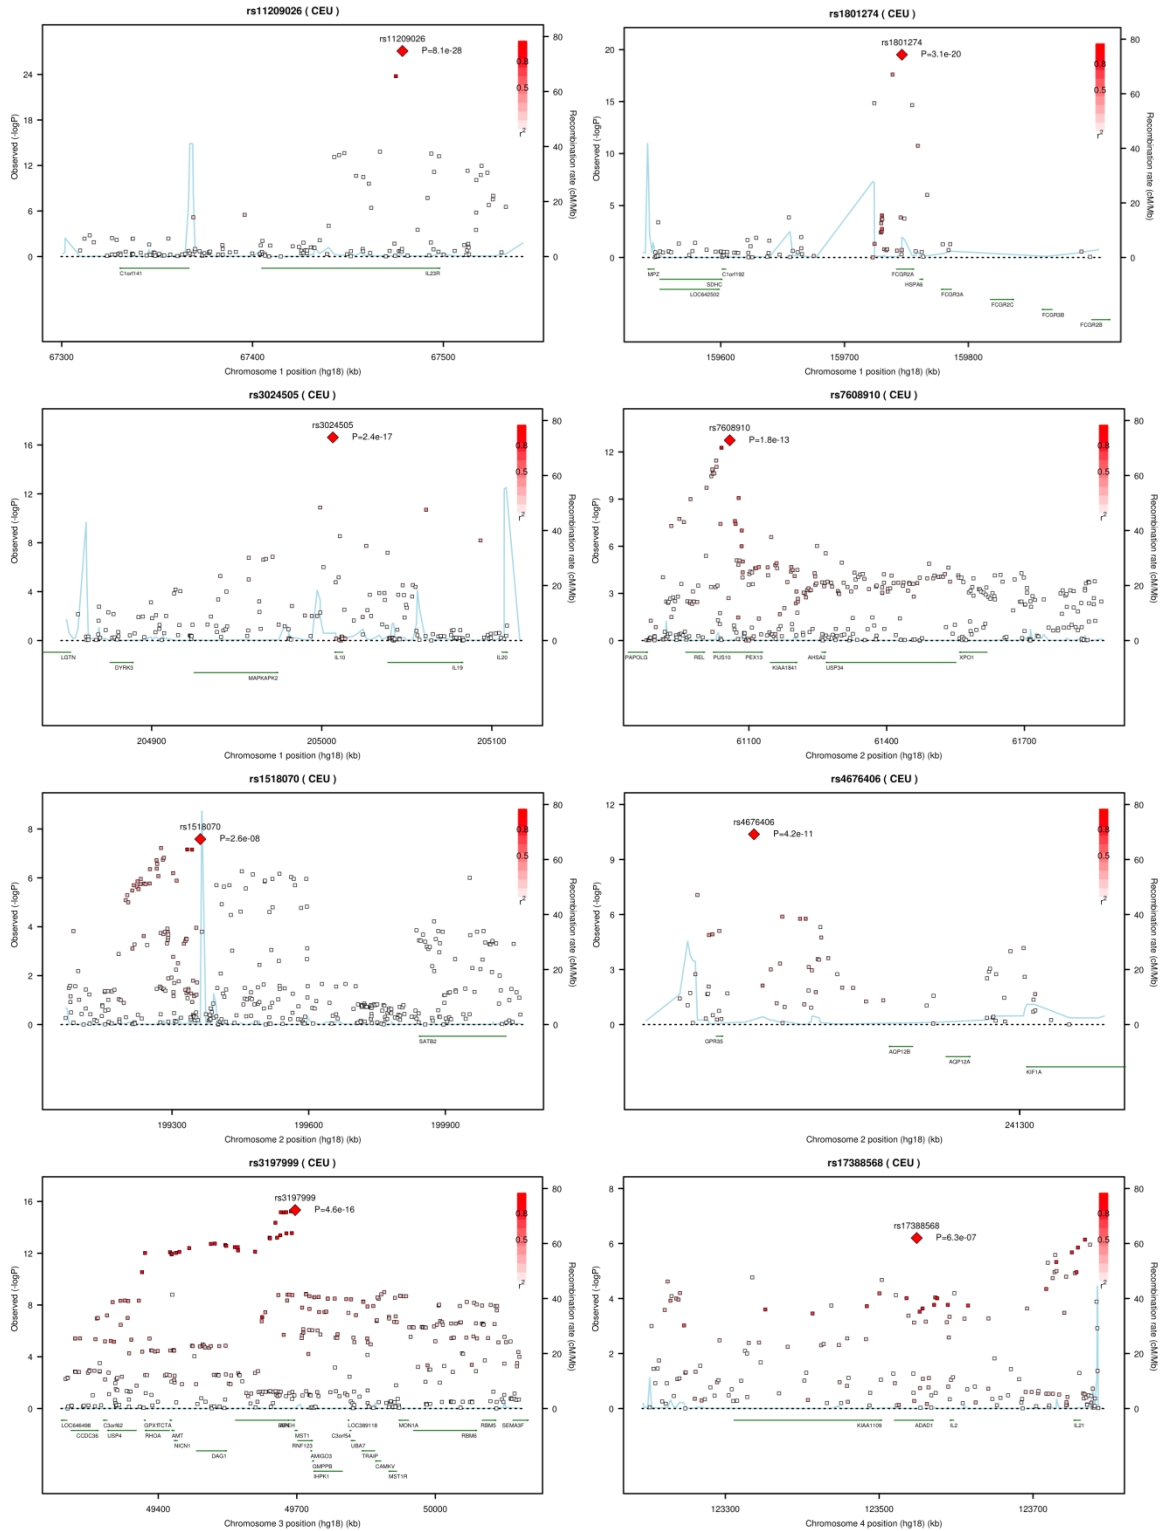

Meta-analysis identifies 29 additional ulcerative colitis risk loci  
Anderson et al.

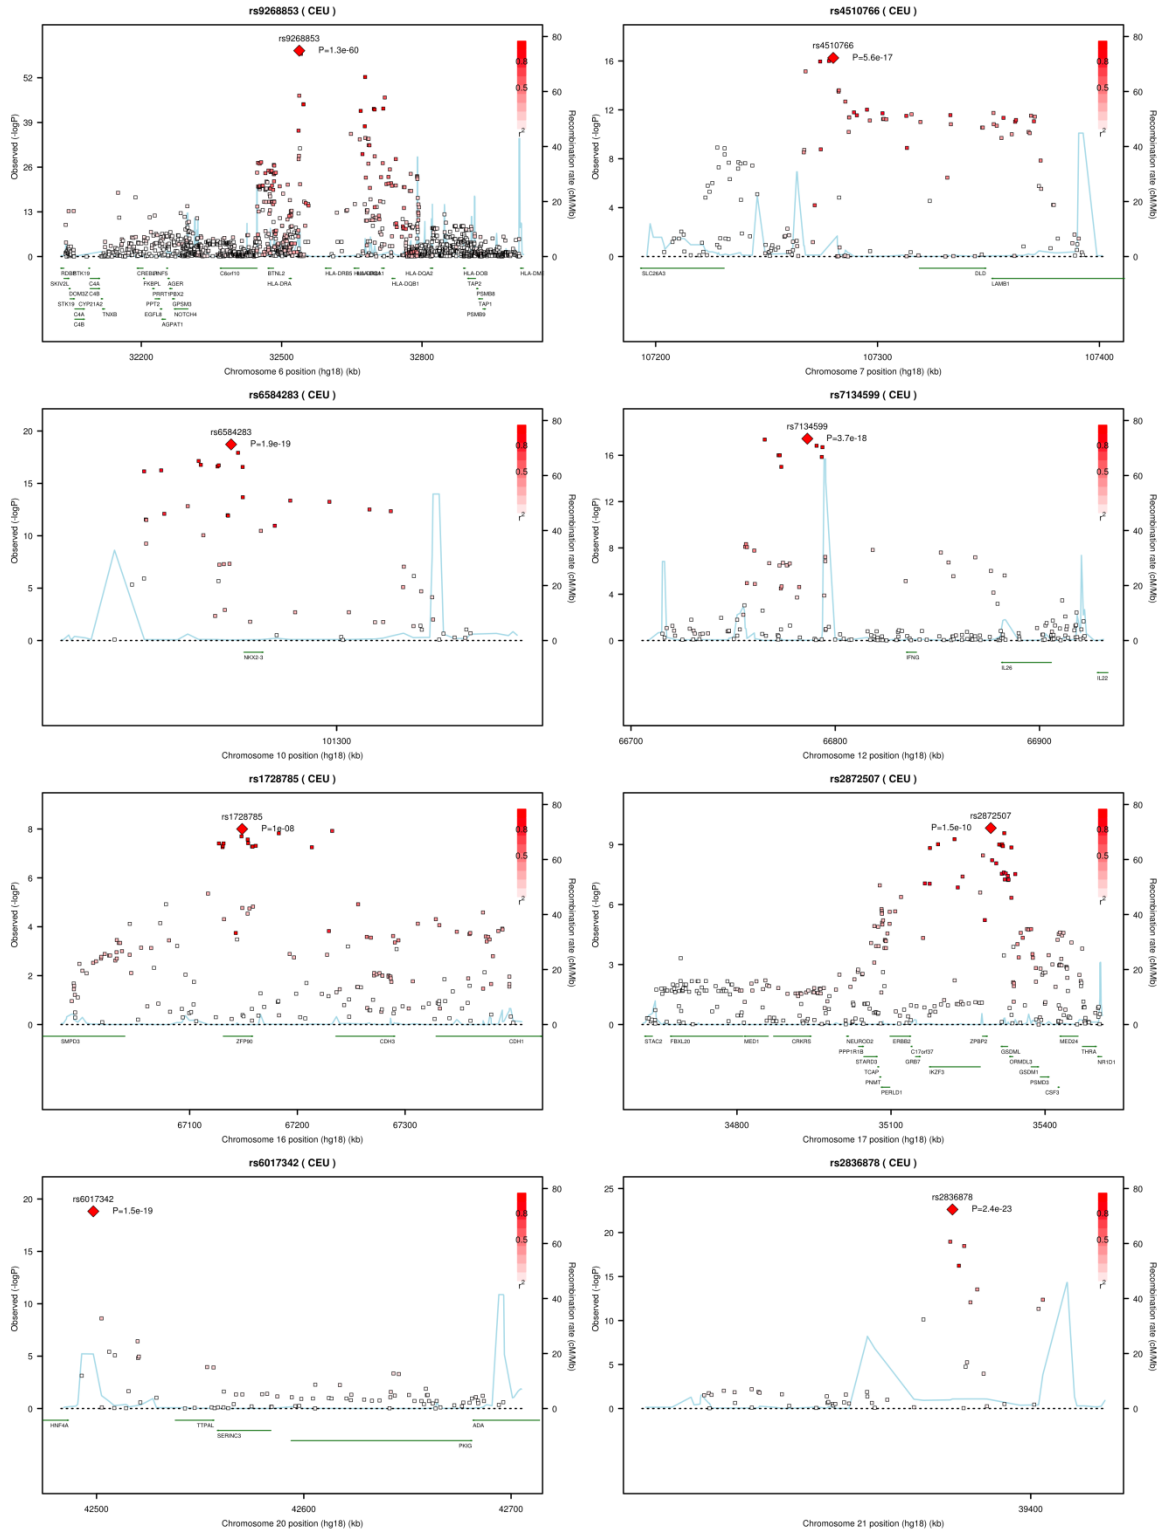

Meta-analysis identifies 29 additional ulcerative colitis risk loci  
Anderson et al.

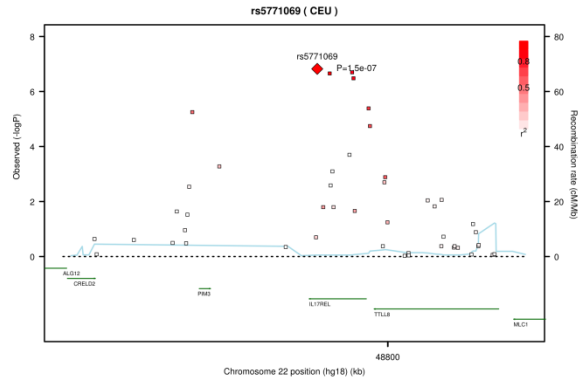

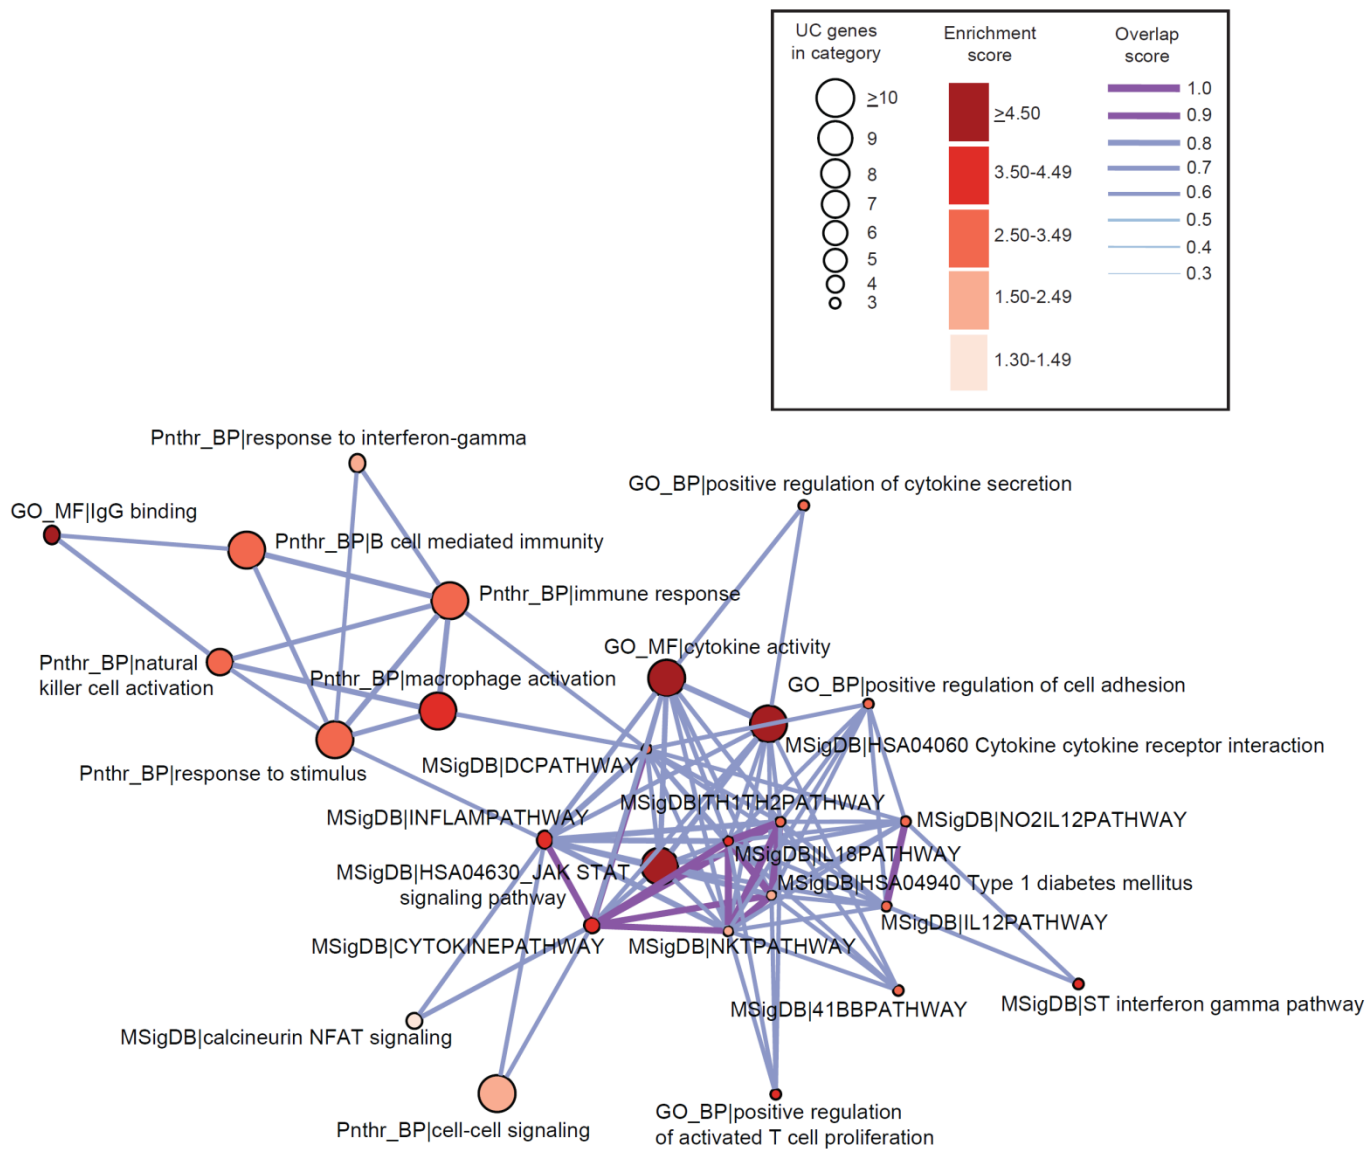

**Supplementary Figure 3. Enrichment of biological functions for genes located in the associated UC risk loci.**

This visual map abstracts the extent of mutual overlap between gene sets and identifies a cluster of strongly connected gene sets that are enriched among genes in UC-associated regions. Nodes denote enriched gene sets or "annotation terms/categories" (assembled from GO-BP, GO-MF, Panther-BP, Panther-MF, Panther-pathways, MSigDB collection of canonical pathways which includes KEGG, BioCarta, STKE, Genmapp). Node size corresponds to the number of UC genes in each gene set (Please see Supplementary Table 8 for list of UC genes in the annotated gene sets). Node color denotes the gene set enrichment score (-Log<sub>10</sub> (p-value)). Please refer to graphical legend (boxed) in figure. All gene sets shown are significantly enriched (p<0.05). The extent of mutually overlapping genes between gene sets is represented by thickness & color intensity of edges connecting nodes. The overlap score is the average of the Jaccard and Overlap coefficients. Strongly connected network components were identified using Tarjan's algorithm. With this representation, we have observed a strong enrichment signal for cytokine signaling / JAK-STAT / immune response-associated processes and pathways for the set of genes in the UC-associated regions.
